# Supplementary material for: Vitamin D status and risk of type 2 diabetes in the Norwegian HUNT cohort study: does family history or genetic predisposition modify the association?
Source: PubMed Central journal article supplement — BMJ Open Diabetes Res Care. 2021 Jan 5;9(1):e001948. doi: 10.1136/bmjdrc-2020-001948 (PMC7786796; doi:10.1136/bmjdrc-2020-001948), 2021-01-05
Supplement: bmjdrc-2020-001948supp001.pdf [file bmjdrc-2020-001948supp001.pdf]

**Supplementary table 1.** 166 single nuclear polymorphisms (SNPs) were used to construct the PRS for T2DM in the HUNT study (n=3467\*)

| SNP         | Chr | Closest gene        | Risk allele | Other allele | RAF <sup>†</sup> | OR   | (95% CI)    | P value | Coefficient |
|-------------|-----|---------------------|-------------|--------------|------------------|------|-------------|---------|-------------|
| rs3768321   | 1   | <i>MACF1</i>        | T           | G            | 0.18             | 1.09 | (1.07-1.10) | 2.6E-26 | 0.0862      |
| rs58432198  | 1   | <i>FAF1</i>         | C           | T            | 0.88             | 1.07 | (1.05-1.09) | 2.1E-10 | 0.0677      |
| rs12140153  | 1   | <i>PATJ</i>         | G           | T            | 0.88             | 1.07 | (1.04-1.09) | 1.3E-8  | 0.0677      |
| rs1127215   | 1   | <i>PTGFRN</i>       | C           | T            | 0.56             | 1.05 | (1.04-1.06) | 1.6E-13 | 0.0488      |
| rs1493694   | 1   | <i>NOTCH2</i>       | T           | C            | 0.12             | 1.09 | (1.07-1.11) | 2.7E-16 | 0.0862      |
| rs145904381 | 1   | <i>FAM63A</i>       | T           | C            | 0.98             | 1.19 | (1.12-1.26) | 2.6E-8  | 0.1740      |
| rs539515    | 1   | <i>SEC16B</i>       | C           | A            | 0.24             | 1.05 | (1.04-1.07) | 1.6E-10 | 0.0488      |
| rs9430095   | 1   | <i>SRGAP2</i>       | C           | G            | 0.52             | 1.04 | (1.02-1.05) | 1.9E-8  | 0.0392      |
| rs340874    | 1   | <i>PROX1</i>        | C           | T            | 0.55             | 1.07 | (1.05-1.08) | 1.6E-22 | 0.0677      |
| rs348330    | 1   | <i>ABCB10</i>       | G           | A            | 0.35             | 1.05 | (1.04-1.07) | 2.7E-14 | 0.0488      |
| rs62107261  | 2   | <i>TMEM18</i>       | T           | C            | 0.97             | 1.12 | (1.08-1.15) | 3.8E-12 | 0.1133      |
| rs11680058  | 2   | <i>FAM49A</i>       | A           | G            | 0.88             | 1.06 | (1.04-1.08) | 1.4E-8  | 0.0583      |
| rs1260326   | 2   | <i>GCKR</i>         | C           | T            | 0.68             | 1.07 | (1.06-1.08) | 6.5E-25 | 0.0677      |
| rs80147536  | 2   | <i>THADA</i>        | A           | T            | 0.92             | 1.13 | (1.11-1.16) | 2.7E-29 | 0.1222      |
| rs10193538  | 2   | <i>BNIP1</i>        | T           | G            | 0.63             | 1.04 | (1.02-1.05) | 8.9E-9  | 0.0392      |
| rs243024    | 2   | <i>BCL11A</i>       | A           | G            | 0.45             | 1.06 | (1.05-1.07) | 2.5E-20 | 0.0583      |
| rs11688682  | 2   | <i>GLI2</i>         | G           | C            | 0.74             | 1.05 | (1.03-1.06) | 4.2E-9  | 0.0488      |
| rs35999103  | 2   | <i>PABPC1P2</i>     | T           | C            | 0.16             | 1.05 | (1.03-1.07) | 9.7E-9  | 0.0488      |
| rs13426680  | 2   | <i>CYTIP</i>        | A           | G            | 0.93             | 1.09 | (1.06-1.11) | 6.7E-10 | 0.0862      |
| rs10195252  | 2   | <i>GRB14/COBLL1</i> | T           | C            | 0.59             | 1.07 | (1.06-1.08) | 6.0E-25 | 0.0677      |

|            |   |                |   |   |      |      |             |         |        |
|------------|---|----------------|---|---|------|------|-------------|---------|--------|
| rs2972144  | 2 | <i>IRS1</i>    | G | A | 0.60 | 1.10 | (1.08-1.11) | 2.1E-46 | 0.0953 |
| rs11709077 | 3 | <i>PPARG</i>   | G | A | 0.86 | 1.14 | (1.11-1.16) | 1.8E-36 | 0.1310 |
| rs35352848 | 3 | <i>UBE2E2</i>  | T | C | 0.76 | 1.07 | (1.05-1.09) | 1.3E-17 | 0.0677 |
| rs4688760  | 3 | <i>RBM6</i>    | T | C | 0.70 | 1.04 | (1.03-1.06) | 3.5E-10 | 0.0392 |
| rs9860730  | 3 | <i>ADAMTS9</i> | A | G | 0.71 | 1.06 | (1.04-1.07) | 4.9E-15 | 0.0583 |
| rs2272163  | 3 | <i>ROBO2</i>   | C | A | 0.61 | 1.04 | (1.02-1.05) | 9.6E-9  | 0.0392 |
| rs11708067 | 3 | <i>ADCY5</i>   | A | G | 0.77 | 1.09 | (1.08-1.11) | 5.2E-32 | 0.0862 |
| rs62271373 | 3 | <i>TSC22D2</i> | A | T | 0.04 | 1.09 | (1.06-1.12) | 1.0E-9  | 0.0862 |
| rs7629630  | 3 | <i>EGFEM1P</i> | A | T | 0.85 | 1.05 | (1.03-1.07) | 2.5E-8  | 0.0488 |
| rs9873618  | 3 | <i>SLC2A2</i>  | G | A | 0.69 | 1.07 | (1.05-1.08) | 4.8E-21 | 0.0677 |
| rs6780171  | 3 | <i>IGF2BP2</i> | A | T | 0.29 | 1.14 | (1.12-1.16) | 9.0E-56 | 0.1310 |
| rs3887925  | 3 | <i>ST6GAL1</i> | T | C | 0.56 | 1.07 | (1.05-1.08) | 3.1E-22 | 0.0677 |
| rs1531583  | 4 | <i>PCGF3</i>   | T | G | 0.06 | 1.13 | (1.09-1.16) | 3.5E-14 | 0.1222 |
| rs56337234 | 4 | <i>MAEA</i>    | C | T | 0.51 | 1.06 | (1.04-1.07) | 8.6E-18 | 0.0583 |
| rs12640250 | 4 | <i>LCORL</i>   | C | A | 0.73 | 1.04 | (1.03-1.05) | 3.7E-8  | 0.0392 |
| rs10938398 | 4 | <i>GNPDA2</i>  | A | G | 0.40 | 1.05 | (1.03-1.06) | 3.6E-12 | 0.0488 |
| rs2102278  | 4 | <i>USP46</i>   | G | A | 0.32 | 1.04 | (1.02-1.05) | 3.7E-8  | 0.0392 |
| rs1903002  | 4 | <i>FAM13A</i>  | G | C | 0.46 | 1.04 | (1.02-1.05) | 2.7E-8  | 0.0392 |
| rs6821438  | 4 | <i>SMARCA1</i> | A | G | 0.51 | 1.04 | (1.03-1.06) | 4.0E-11 | 0.0392 |
| rs1580278  | 4 | <i>SLC9B1</i>  | C | A | 0.45 | 1.04 | (1.03-1.05) | 2.2E-10 | 0.0392 |
| rs1296328  | 4 | <i>PABPC4L</i> | A | C | 0.45 | 1.04 | (1.02-1.05) | 3.5E-8  | 0.0392 |
| rs7669833  | 4 | <i>TMEM154</i> | T | A | 0.71 | 1.06 | (1.04-1.07) | 1.2E-14 | 0.0583 |

|             |   |                |   |   |      |      |             |         |        |
|-------------|---|----------------|---|---|------|------|-------------|---------|--------|
| rs58730668  | 4 | <i>ACSL1</i>   | T | C | 0.86 | 1.07 | (1.05-1.09) | 1.3E-13 | 0.0677 |
| rs3845281   | 5 | <i>ANKH</i>    | G | A | 0.90 | 1.08 | (1.06-1.10) | 2.3E-11 | 0.0770 |
| rs17250977  | 5 | <i>ANKH</i>    | G | A | 0.03 | 1.12 | (1.09-1.16) | 2.0E-11 | 0.1133 |
| rs702634    | 5 | <i>ARL15</i>   | A | G | 0.68 | 1.05 | (1.04-1.07) | 7.7E-14 | 0.0488 |
| rs9687832   | 5 | <i>ANKRD55</i> | A | G | 0.16 | 1.08 | (1.06-1.10) | 1.7E-20 | 0.0770 |
| rs2307111   | 5 | <i>POC5</i>    | T | C | 0.61 | 1.05 | (1.04-1.07) | 2.1E-16 | 0.0488 |
| rs4457053   | 5 | <i>ZBED3</i>   | G | A | 0.29 | 1.06 | (1.05-1.08) | 8.4E-18 | 0.0583 |
| rs7719891   | 5 | <i>RASA1</i>   | G | A | 0.27 | 1.04 | (1.03-1.06) | 2.4E-8  | 0.0392 |
| rs115505614 | 5 | <i>PAM</i>     | T | C | 0.04 | 1.19 | (1.15-1.22) | 1.3E-30 | 0.1740 |
| rs329122    | 5 | <i>PHF15</i>   | A | G | 0.44 | 1.04 | (1.03-1.05) | 3.6E-9  | 0.0392 |
| rs9379084   | 6 | <i>RREB1</i>   | G | A | 0.92 | 1.11 | (1.08-1.13) | 3.3E-21 | 0.1044 |
| rs7756992   | 6 | <i>CDKAL1</i>  | G | A | 0.27 | 1.15 | (1.13-1.17) | 2.4E-88 | 0.1398 |
| rs6458354   | 6 | <i>VEGFA</i>   | C | T | 0.30 | 1.05 | (1.04-1.07) | 2.1E-12 | 0.0488 |
| rs3798519   | 6 | <i>TFAP2B</i>  | C | A | 0.18 | 1.06 | (1.04-1.08) | 2.6E-12 | 0.0583 |
| rs4946812   | 6 | <i>BEND3</i>   | G | A | 0.65 | 1.04 | (1.03-1.05) | 8.2E-9  | 0.0392 |
| rs11759026  | 6 | <i>CENPW</i>   | G | A | 0.25 | 1.07 | (1.05-1.08) | 2.4E-18 | 0.0677 |
| rs9494624   | 6 | <i>SLC35D3</i> | A | G | 0.29 | 1.04 | (1.03-1.06) | 6.1E-9  | 0.0392 |
| rs474513    | 6 | <i>SLC22A3</i> | A | G | 0.52 | 1.04 | (1.03-1.05) | 8.1E-10 | 0.0392 |
| rs4709746   | 6 | <i>QKI</i>     | C | T | 0.84 | 1.06 | (1.04-1.08) | 5.8E-9  | 0.0583 |
| rs17168486  | 7 | <i>DGKB</i>    | T | C | 0.17 | 1.07 | (1.06-1.09) | 2.3E-17 | 0.0677 |
| rs10228066  | 7 | <i>DGKB</i>    | T | C | 0.52 | 1.07 | (1.06-1.09) | 1.1E-28 | 0.0677 |
| rs1708302   | 7 | <i>JAZF1</i>   | C | T | 0.55 | 1.10 | (1.08-1.11) | 1.1E-48 | 0.0953 |

|            |   |                 |   |   |      |      |             |          |        |
|------------|---|-----------------|---|---|------|------|-------------|----------|--------|
| rs878521   | 7 | <i>GCK</i>      | A | G | 0.23 | 1.06 | (1.04-1.07) | 1.9E-13  | 0.0583 |
| rs11496066 | 7 | <i>FBXL13</i>   | T | C | 0.83 | 1.08 | (1.05-1.11) | 1.1E-8   | 0.0770 |
| rs6976111  | 7 | <i>CTTNBP2</i>  | A | C | 0.34 | 1.04 | (1.03-1.06) | 1.2E-8   | 0.0392 |
| rs1562396  | 7 | <i>KLF14</i>    | G | A | 0.30 | 1.06 | (1.05-1.08) | 9.9E-18  | 0.0583 |
| rs6459733  | 7 | <i>MNX1</i>     | G | C | 0.69 | 1.06 | (1.05-1.07) | 2.4E-17  | 0.0583 |
| rs10096633 | 8 | <i>LPL</i>      | C | T | 0.89 | 1.07 | (1.05-1.09) | 1.1E-12  | 0.0677 |
| rs10954772 | 8 | <i>PURG</i>     | T | C | 0.28 | 1.04 | (1.03-1.06) | 1.8E-9   | 0.0392 |
| rs13262861 | 8 | <i>ANK1</i>     | C | A | 0.86 | 1.07 | (1.05-1.09) | 4.0E-12  | 0.0677 |
| rs10097617 | 8 | <i>TP53INP1</i> | T | C | 0.53 | 1.04 | (1.03-1.06) | 3.3E-11  | 0.0392 |
| rs3802177  | 8 | <i>SLC30A8</i>  | G | A | 0.69 | 1.11 | (1.10-1.13) | 1.1E-55  | 0.1044 |
| rs17772814 | 8 | <i>CASC11</i>   | G | A | 0.91 | 1.08 | (1.05-1.11) | 5.4E-10  | 0.0770 |
| rs1561927  | 8 | <i>PVT1</i>     | C | T | 0.27 | 1.04 | (1.03-1.06) | 1.5E-9   | 0.0392 |
| rs4977213  | 8 | <i>BOP1</i>     | C | T | 0.32 | 1.05 | (1.04-1.07) | 9.1E-14  | 0.0488 |
| rs12719778 | 8 | <i>BOP1</i>     | T | C | 0.55 | 1.04 | (1.03-1.05) | 5.0E-9   | 0.0392 |
| rs10974438 | 9 | <i>GLIS3</i>    | C | A | 0.35 | 1.05 | (1.04-1.07) | 1.5E-14  | 0.0488 |
| rs7022807  | 9 | <i>HAUS6</i>    | G | A | 0.39 | 1.04 | (1.03-1.05) | 2.7E-10  | 0.0392 |
| rs10811660 | 9 | <i>CDKN2A/B</i> | G | A | 0.83 | 1.27 | (1.24-1.29) | 1.4E-115 | 0.2390 |
| rs1412234  | 9 | <i>LINGO2</i>   | C | T | 0.31 | 1.04 | (1.03-1.06) | 1.9E-10  | 0.0392 |
| rs12001437 | 9 | <i>UBAP2</i>    | C | T | 0.37 | 1.04 | (1.03-1.06) | 2.8E-10  | 0.0392 |
| rs17791513 | 9 | <i>TLE4</i>     | A | G | 0.93 | 1.10 | (1.08-1.13) | 3.1E-14  | 0.0953 |
| rs2796441  | 9 | <i>TLE1</i>     | G | A | 0.58 | 1.07 | (1.05-1.08) | 4.4E-24  | 0.0677 |
| rs55653563 | 9 | <i>ZNF169</i>   | A | C | 0.74 | 1.04 | (1.03-1.06) | 2.2E-9   | 0.0392 |

|             |    |                      |   |   |      |      |             |          |        |
|-------------|----|----------------------|---|---|------|------|-------------|----------|--------|
| rs505922    | 9  | <i>ABO</i>           | C | T | 0.37 | 1.05 | (1.03-1.06) | 3.9E-12  | 0.0488 |
| rs28505901  | 9  | <i>GPSM1</i>         | G | A | 0.73 | 1.09 | (1.07-1.11) | 6.7E-26  | 0.0862 |
| rs11257655  | 10 | <i>CDC123/CAMK1D</i> | T | C | 0.20 | 1.09 | (1.08-1.11) | 1.5E-32  | 0.0862 |
| rs703972    | 10 | <i>ZMIZ1</i>         | G | C | 0.54 | 1.07 | (1.06-1.09) | 1.7E-29  | 0.0677 |
| rs10882101  | 10 | <i>HHEX/IDE</i>      | T | C | 0.57 | 1.06 | (1.04-1.08) | 1.4E-8   | 0.0583 |
| rs184509201 | 10 | <i>TCF7L2</i>        | C | G | 0.99 | 1.21 | (1.15-1.27) | 1.2E-13  | 0.1906 |
| rs7903146   | 10 | <i>TCF7L2</i>        | T | C | 0.26 | 1.37 | (1.35-1.39) | 5.8E-447 | 0.3148 |
| rs4929965   | 11 | <i>INS/IGF2</i>      | A | G | 0.38 | 1.07 | (1.06-1.09) | 4.0E-26  | 0.0677 |
| rs2283220   | 11 | <i>KCNQ1</i>         | A | G | 0.69 | 1.05 | (1.03-1.06) | 1.4E-9   | 0.0488 |
| rs2237895   | 11 | <i>KCNQ1</i>         | C | A | 0.45 | 1.12 | (1.11-1.14) | 6.0E-52  | 0.1133 |
| rs141521721 | 11 | <i>PDE3B</i>         | A | C | 0.01 | 1.13 | (1.08-1.17) | 2.7E-8   | 0.1222 |
| rs5213      | 11 | <i>KCNJ11</i>        | C | T | 0.40 | 1.07 | (1.06-1.09) | 3.5E-27  | 0.0677 |
| rs145678014 | 11 | <i>QSER1</i>         | G | T | 0.96 | 1.11 | (1.07-1.14) | 2.0E-10  | 0.1044 |
| rs1061810   | 11 | <i>HSD17B12</i>      | A | C | 0.28 | 1.05 | (1.04-1.07) | 6.0E-13  | 0.0488 |
| rs1783541   | 11 | <i>MAP3K11</i>       | T | C | 0.19 | 1.06 | (1.05-1.08) | 2.0E-14  | 0.0583 |
| rs77464186  | 11 | <i>CENTD2/ARAP1</i>  | A | C | 0.82 | 1.11 | (1.09-1.13) | 4.7E-33  | 0.1044 |
| rs10830963  | 11 | <i>MTNR1B</i>        | G | C | 0.27 | 1.10 | (1.09-1.12) | 4.8E-43  | 0.0953 |
| rs10750397  | 11 | <i>ETSI</i>          | A | G | 0.29 | 1.05 | (1.04-1.07) | 8.3E-13  | 0.0488 |
| rs67232546  | 11 | <i>ETSI</i>          | T | C | 0.18 | 1.06 | (1.04-1.07) | 1.3E-11  | 0.0583 |
| rs11063028  | 12 | <i>CCND2</i>         | C | T | 0.15 | 1.06 | (1.04-1.07) | 8.5E-11  | 0.0583 |
| rs4238013   | 12 | <i>CCND2</i>         | C | T | 0.23 | 1.06 | (1.04-1.07) | 3.2E-11  | 0.0583 |
| rs76895963  | 12 | <i>CCND2</i>         | T | G | 0.98 | 1.62 | (1.54-1.71) | 1.4E-69  | 0.4824 |

|            |    |                    |   |   |      |      |             |         |        |
|------------|----|--------------------|---|---|------|------|-------------|---------|--------|
| rs10842994 | 12 | <i>KLHDC5</i>      | C | T | 0.80 | 1.08 | (1.06-1.09) | 4.1E-20 | 0.0770 |
| rs2258238  | 12 | <i>HMGA2</i>       | T | A | 0.11 | 1.10 | (1.08-1.13) | 4.5E-21 | 0.0953 |
| rs1796330  | 12 | <i>TSPAN8/LGR5</i> | G | C | 0.54 | 1.05 | (1.04-1.06) | 2.2E-14 | 0.0488 |
| rs2197973  | 12 | <i>USP44</i>       | T | C | 0.54 | 1.04 | (1.02-1.05) | 3.6E-8  | 0.0392 |
| rs77864822 | 12 | <i>RMST</i>        | A | G | 0.91 | 1.08 | (1.05-1.11) | 1.1E-8  | 0.0770 |
| rs1426371  | 12 | <i>WSCD2</i>       | G | A | 0.75 | 1.05 | (1.04-1.07) | 8.2E-12 | 0.0488 |
| rs34965774 | 12 | <i>KSR2</i>        | A | G | 0.15 | 1.06 | (1.04-1.08) | 2.0E-9  | 0.0583 |
| rs56348580 | 12 | <i>HNFA</i>        | G | C | 0.71 | 1.05 | (1.04-1.07) | 2.3E-13 | 0.0488 |
| rs12811407 | 12 | <i>FBRSL1</i>      | A | G | 0.35 | 1.05 | (1.04-1.07) | 1.7E-12 | 0.0488 |
| rs34584161 | 13 | <i>RNF6</i>        | A | G | 0.76 | 1.05 | (1.03-1.06) | 2.2E-10 | 0.0488 |
| rs11842871 | 13 | <i>HMGB1</i>       | G | T | 0.72 | 1.04 | (1.03-1.06) | 1.2E-8  | 0.0392 |
| rs9563615  | 13 | <i>SRGAP2D</i>     | A | T | 0.73 | 1.05 | (1.03-1.06) | 6.4E-11 | 0.0488 |
| rs1359790  | 13 | <i>SPRY2</i>       | G | A | 0.72 | 1.09 | (1.07-1.10) | 2.4E-31 | 0.0862 |
| rs7987740  | 13 | <i>IRS2</i>        | T | C | 0.62 | 1.04 | (1.02-1.05) | 4.0E-8  | 0.0392 |
| rs17122772 | 14 | <i>SLC7A7</i>      | G | C | 0.24 | 1.04 | (1.03-1.06) | 1.6E-8  | 0.0392 |
| rs17522122 | 14 | <i>AKAP6</i>       | T | G | 0.47 | 1.04 | (1.03-1.05) | 3.2E-9  | 0.0392 |
| rs17836088 | 14 | <i>NRXN3</i>       | C | G | 0.19 | 1.06 | (1.04-1.08) | 6.7E-14 | 0.0583 |
| rs8010382  | 14 | <i>SMEK1</i>       | G | A | 0.43 | 1.04 | (1.03-1.05) | 6.5E-9  | 0.0392 |
| rs62007683 | 14 | <i>MARK3</i>       | G | T | 0.63 | 1.04 | (1.02-1.05) | 3.1E-8  | 0.0392 |
| rs34715063 | 15 | <i>RASGRP1</i>     | C | T | 0.14 | 1.1  | (1.07-1.12) | 2.3E-19 | 0.0953 |
| rs8037894  | 15 | <i>C2CD4A/B</i>    | G | C | 0.53 | 1.05 | (1.03-1.06) | 2.6E-13 | 0.0488 |
| rs7178762  | 15 | <i>USP3</i>        | C | T | 0.48 | 1.04 | (1.03-1.05) | 5.4E-10 | 0.0392 |

|            |    |               |   |   |      |      |             |         |        |
|------------|----|---------------|---|---|------|------|-------------|---------|--------|
| rs1005752  | 15 | <i>HMG20A</i> | A | C | 0.71 | 1.08 | (1.07-1.10) | 2.5E-29 | 0.0770 |
| rs4932265  | 15 | <i>AP3S2</i>  | T | C | 0.27 | 1.07 | (1.05-1.08) | 4.2E-20 | 0.0677 |
| rs6600191  | 16 | <i>ITFG3</i>  | T | C | 0.84 | 1.06 | (1.05-1.08) | 9.3E-13 | 0.0583 |
| rs3751837  | 16 | <i>CLUAP1</i> | T | C | 0.22 | 1.04 | (1.03-1.06) | 1.4E-8  | 0.0392 |
| rs11642430 | 16 | <i>FAM57B</i> | G | C | 0.41 | 1.04 | (1.03-1.05) | 2.2E-9  | 0.0392 |
| rs1421085  | 16 | <i>FTO</i>    | C | T | 0.42 | 1.13 | (1.12-1.15) | 3.1E-84 | 0.1222 |
| rs72802342 | 16 | <i>BCAR1</i>  | C | A | 0.92 | 1.17 | (1.14-1.20) | 4.0E-32 | 0.1570 |
| rs2925979  | 16 | <i>CMIP</i>   | T | C | 0.31 | 1.05 | (1.04-1.07) | 1.4E-14 | 0.0488 |
| rs12920022 | 16 | <i>SPG7</i>   | A | T | 0.16 | 1.05 | (1.04-1.07) | 3.4E-9  | 0.0488 |
| rs1377807  | 17 | <i>ZZEF1</i>  | C | G | 0.29 | 1.05 | (1.04-1.07) | 4.2E-13 | 0.0488 |
| rs7222481  | 17 | <i>GLP2R</i>  | C | G | 0.31 | 1.04 | (1.03-1.05) | 1.4E-8  | 0.0392 |
| rs4925109  | 17 | <i>RAI1</i>   | A | G | 0.29 | 1.05 | (1.03-1.06) | 2.8E-12 | 0.0488 |
| rs71372253 | 17 | <i>NF1</i>    | C | T | 0.06 | 1.08 | (1.05-1.10) | 4.4E-8  | 0.0770 |
| rs10908278 | 17 | <i>HNF1B</i>  | T | A | 0.45 | 1.08 | (1.07-1.10) | 6.4E-36 | 0.0770 |
| rs35895680 | 17 | <i>TTL6</i>   | C | A | 0.70 | 1.06 | (1.04-1.07) | 2.5E-15 | 0.0583 |
| rs60276348 | 17 | <i>ACE</i>    | T | C | 0.11 | 1.05 | (1.03-1.07) | 2.6E-8  | 0.0488 |
| rs61676547 | 17 | <i>BPTF</i>   | C | G | 0.19 | 1.06 | (1.04-1.07) | 2.9E-11 | 0.0583 |
| rs7240767  | 18 | <i>LAMA1</i>  | C | T | 0.39 | 1.04 | (1.02-1.05) | 1.6E-8  | 0.0392 |
| rs62080313 | 18 | <i>COMMD9</i> | C | T | 0.10 | 1.06 | (1.04-1.08) | 1.0E-8  | 0.0583 |
| rs72926932 | 18 | <i>TCF4</i>   | C | A | 0.08 | 1.09 | (1.07-1.12) | 1.0E-14 | 0.0862 |
| rs17684074 | 18 | <i>WDR7</i>   | G | C | 0.72 | 1.04 | (1.03-1.06) | 2.9E-8  | 0.0392 |
| rs9957145  | 18 | <i>GRP</i>    | G | A | 0.87 | 1.05 | (1.03-1.07) | 8.1E-9  | 0.0488 |

|             |    |             |   |   |      |      |             |         |        |
|-------------|----|-------------|---|---|------|------|-------------|---------|--------|
| rs4804833   | 19 | MAP2K7      | A | G | 0.39 | 1.05 | (1.03-1.06) | 7.7E-13 | 0.0488 |
| rs3111316   | 19 | FARSA       | A | G | 0.59 | 1.05 | (1.03-1.06) | 6.3E-13 | 0.0488 |
| rs8107974   | 19 | TM6SF2      | T | A | 0.09 | 1.10 | (1.07-1.12) | 3.3E-15 | 0.0953 |
| rs10406327  | 19 | PEPD        | C | G | 0.50 | 1.04 | (1.02-1.05) | 3.8E-8  | 0.0392 |
| rs429358    | 19 | TOMM40/APOE | T | C | 0.82 | 1.08 | (1.06-1.10) | 2.6E-18 | 0.0770 |
| rs10406431  | 19 | GIPR        | A | G | 0.53 | 1.05 | (1.04-1.06) | 9.6E-14 | 0.0488 |
| rs13041756  | 20 | NKX2.2      | C | T | 0.10 | 1.06 | (1.04-1.08) | 1.4E-8  | 0.0583 |
| rs2268078   | 20 | RALY        | A | G | 0.68 | 1.04 | (1.03-1.06) | 2.3E-10 | 0.0392 |
| rs1800961   | 20 | HNF4A       | T | C | 0.05 | 1.18 | (1.15-1.23) | 2.3E-22 | 0.1655 |
| rs11699802  | 20 | CEBPB       | C | T | 0.57 | 1.04 | (1.03-1.06) | 1.8E-11 | 0.0392 |
| rs6070625   | 20 | GNAS        | G | C | 0.55 | 1.05 | (1.04-1.06) | 5.3E-14 | 0.0488 |
| rs6518681   | 22 | MTMR3/ASCC2 | G | A | 0.93 | 1.09 | (1.06-1.11) | 1.1E-12 | 0.0862 |
| rs117001013 | 22 | YWHAH       | C | T | 0.91 | 1.07 | (1.04-1.09) | 1.7E-8  | 0.0677 |
| rs738408    | 22 | PNPLA3      | T | C | 0.24 | 1.05 | (1.03-1.07) | 1.4E-10 | 0.0488 |

HUNT: the Trøndelag Health Study; OR: odds ratio; PRS: polygenic risk score; RAF: risk allele frequency; T2DM: type 2 diabetes mellitus

\*Missing information on SNPs in 107 participants

†RAF was based on approximately 72 000 participants in the HUNT study

OR with 95% CI and *P* value are from the study by Mahajan *et al.*<sup>1</sup> The coefficients were ln(OR) and were used as weights to calculate the PRS.

1. Mahajan A, Taliun D, Thurner M, et al. Fine-mapping type 2 diabetes loci to single-variant resolution using high-density imputation and islet-specific epigenome maps. *Nat Genet* 2018;50(11):1505-13. doi: 10.1038/s41588-018-0241-6 [published Online First: 2018/10/10]



**Supplementary table 2.** Association between baseline seasonal-standardized serum 25(OH)D level and the 11-year risk of T2DM

Analyses after performing multiple imputation of missing data of covariates

| Seasonal-standardized serum 25(OH)D level (nmol/L) | No. of participants | No. of cases | Risk (%) | Adjusted OR (95% CI)* |
|----------------------------------------------------|---------------------|--------------|----------|-----------------------|
| Categorical                                        |                     |              |          |                       |
| <50.0                                              | 2059                | 67           | 3.3%     | 1.63 (0.99 to 2.69)   |
| ≥50.0                                              | 1515                | 25           | 1.7%     | 1.00 (reference)      |
| Continuous <sup>†</sup>                            |                     |              |          |                       |
|                                                    | 3574                | 92           | 2.6%     | 1.27 (0.86 to 1.89)   |

25(OH)D: 25-hydroxyvitamin D; CI: confidence interval; OR: odds ratio; T2DM: type 2 diabetes mellitus

T2DM was defined as reported diabetes and/or non-fasting serum glucose levels of  $\geq 11$  mmol/L and the value of serum glutamic acid decarboxylase antibodies (GADA)  $< 0.08$  ai.

\*Adjusted for age, sex, education, economic difficulties, BMI, smoking status, alcohol consumption, physical activity, sitting time per day, family history of diabetes and chronic diseases

<sup>†</sup>per 25 nmol/L decrease in serum 25(OH)D

**Supplementary table 3.** Baseline characteristics of those who did not or did participate in HUNT3 in the 10% random sample of HUNT2 participants with available 25(OH)D level (n=6377)

|                               | <b>Did not participate in HUNT3 (n=2706)</b> | <b>Participated in HUNT3 (n=3671)</b> |
|-------------------------------|----------------------------------------------|---------------------------------------|
| <b>Age (years)</b>            | 54.2±20.4                                    | 46.9±13.5                             |
| <b>BMI (kg/m<sup>2</sup>)</b> | 26.6±4.4                                     | 26.1±3.8                              |
| <b>25(OH)D (nmol/L)</b>       | 47.2±18.3                                    | 48.5±16.1                             |
| <b>Sex</b>                    |                                              |                                       |
| Female                        | 1384 (51.1%)                                 | 2011 (54.8%)                          |
| Male                          | 1322 (48.9%)                                 | 1660 (45.2%)                          |
| <b>Education (years)</b>      |                                              |                                       |
| <10                           | 1082 (40.0%)                                 | 1098 (29.9%)                          |
| 10-12                         | 740 (27.3%)                                  | 1345 (36.6%)                          |
| ≥13                           | 641 (23.7%)                                  | 1133 (30.9%)                          |
| Unknown                       | 243 (9.0%)                                   | 95 (2.6%)                             |
| <b>Economic difficulties</b>  |                                              |                                       |
| No                            | 951 (35.1%)                                  | 2174 (59.2%)                          |
| Yes                           | 510 (18.8%)                                  | 794 (21.6%)                           |
| Unknown                       | 1245 (46.0%)                                 | 703 (19.2%)                           |
| <b>Smoking status</b>         |                                              |                                       |
| Never                         | 1093 (40.4%)                                 | 1097 (29.9%)                          |
| Former                        | 1068 (39.5%)                                 | 1869 (50.9%)                          |

|                                                                |              |              |
|----------------------------------------------------------------|--------------|--------------|
| Current                                                        | 263 (9.7%)   | 441 (12.0%)  |
| Unknown                                                        | 282 (10.4%)  | 264 (7.2%)   |
| <b>Alcohol intake per month [0 (abstainer)/1–4/≥5/unknown]</b> |              |              |
| 0 (abstainer)                                                  | 1093 (40.4%) | 1097 (29.9%) |
| 1-4                                                            | 1068 (39.5%) | 1869 (50.9%) |
| ≥5                                                             | 263 (9.7%)   | 441 (12.0%)  |
| Unknown                                                        | 282 (10.4%)  | 264 (7.2%)   |
| <b>Physical activity</b>                                       |              |              |
| Inactive                                                       | 598 (22.1%)  | 769 (20.9%)  |
| Low                                                            | 433 (16.0%)  | 688 (18.7%)  |
| Moderate                                                       | 467 (17.3%)  | 911 (24.8%)  |
| High                                                           | 214 (7.9%)   | 330 (9.0%)   |
| Unknown                                                        | 994 (36.7%)  | 973 (26.5%)  |
| <b>Sitting time, hours/day</b>                                 |              |              |
| ≤4                                                             | 591 (21.8%)  | 984 (26.8%)  |
| 5-7                                                            | 613 (22.7%)  | 900 (24.5%)  |
| ≥8                                                             | 691 (25.5%)  | 1108 (30.2%) |
| Unknown                                                        | 811 (30.0%)  | 679 (18.5%)  |
| <b>Family history of diabetes</b>                              |              |              |
| No                                                             | 1691 (62.5%) | 2547 (69.4%) |
| Yes                                                            | 389 (14.4%)  | 617 (16.8%)  |
| Unknown                                                        | 626 (23.1%)  | 507 (13.8%)  |

**Chronic diseases**

|         |              |              |
|---------|--------------|--------------|
| No      | 1432 (52.9%) | 2575 (70.1%) |
| Yes     | 1128 (41.7%) | 997 (27.2%)  |
| Unknown | 146 (5.4%)   | 99 (2.7%)    |

25(OH)D: 25-hydroxyvitamin D; BMI: body mass index; HUNT: the Trøndelag Health Study; T2DM: type 2 diabetes mellitus

Data are given as number of participants (column percentage) or mean±standard deviation.

**Supplementary figure 1.** Association between baseline seasonal-standardized serum 25(OH)D level and the 11-year risk of T2DM, stratified by PRS for T2DM. The PRS for T2DM was classified as a binary variable using different cut-off values

| PRS cut-off groups | No. of participants | No. of cases | Risk (%) |  | OR*  | 95% CI         |
|--------------------|---------------------|--------------|----------|--|------|----------------|
| PRS top 1/2        | 1734                | 62           | 3.6      |  | 1.67 | (0.89 to 3.16) |
| PRS bottom 1/2     | 1733                | 22           | 1.3      |  | 1.34 | (0.47 to 3.78) |
| PRS top 1/3        | 1155                | 53           | 4.6      |  | 1.78 | (0.86 to 3.73) |
| PRS bottom 2/3     | 2312                | 31           | 1.3      |  | 1.00 | (0.44 to 2.31) |
| PRS top 1/4        | 866                 | 43           | 5.0      |  | 1.70 | (0.72 to 3.98) |
| PRS bottom 3/4     | 2601                | 41           | 1.6      |  | 1.16 | (0.56 to 2.40) |
| PRS top 1/5        | 693                 | 35           | 5.1      |  | 1.37 | (0.56 to 3.36) |
| PRS bottom 4/5     | 2774                | 49           | 1.8      |  | 1.47 | (0.74 to 2.90) |

0.50 1.01.41  
OR with 95% CI

\*The ORs represent the relative risk for incident T2DM in adults with 25(OH)D level <50 nmol/L compared with those of  $\geq 50.0$  nmol/L and were adjusted for age, sex, education, economic difficulties, BMI, smoking status, alcohol consumption, physical activity, sitting time per day, family history of diabetes and chronic diseases.

25(OH)D: 25-hydroxyvitamin D; CI: confidence interval; OR: odds ratio; PRS: polygenic risk score; T2DM: type 2 diabetes mellitus.

**Supplementary figure 2.** Distribution of serum 25(OH)D levels (nmol/L) by month of blood draw (January–December) in the HUNT2 survey

(A) The random sample of HUNT2 (n=6377)

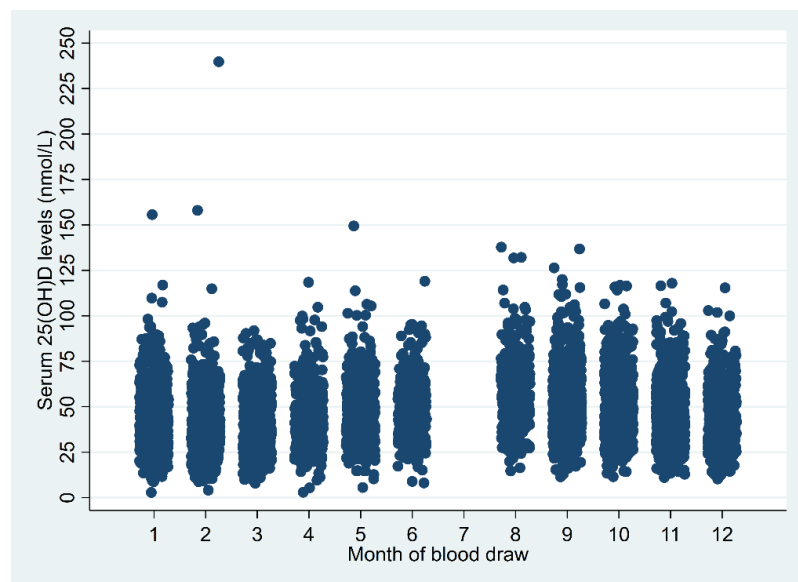

(B) The analysis sample of HUNT2 (n=3574)

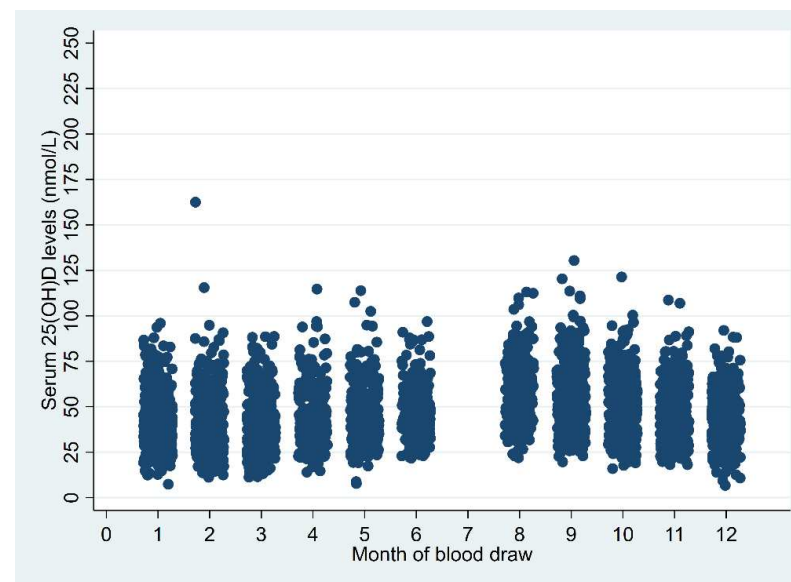

The figure shows the distribution of measured serum 25(OH)D by month of blood draw in the 10% random sample of HUNT2 participants whose blood sample were available [(A): n=6377] and in the analysis sample [(B): n=3574]. Levels of serum 25(OH)D are higher around summer and early autumn months (June–October) when sun exposure is greater, and lower in winter. The patterns are similar between the two samples, indicating less likely selection bias.

25(OH)D: 25-hydroxyvitamin D; HUNT: the Trøndelag Health Study
